# Supplementary material for: Structural evolution and mechanical stabilities of head-to-side nanowelding of Cu–Ag bimetallic nanowires via atomistic simulations
Source: Royal Society of Chemistry journal article supplement (doi:10.1039/d2cp04965a), 2023-01-01
Supplement: d2cp04965a1.pdf [file d2cp04965a1.pdf]

Supporting information for  
Structural evolution and mechanical stabilities of head-to-side  
nanowelding of Cu-Ag bimetallic nanowires via atomistic  
simulations

Ranran Fang<sup>1,a)</sup>, Zhentao Li<sup>1</sup>, Lijuan Guo<sup>1</sup>, Hui Li<sup>2,b)</sup>

<sup>1</sup>*School of Intelligent Manufacturing and Control Engineering, Shandong Institute of Petroleum and Chemical Technology, Dongying 257061, People's Republic of China*

<sup>2</sup>*Key Laboratory for Liquid-Solid Structural Evolution and Processing of Materials, Ministry of Education, Shandong University, Jinan 250061, People's Republic of China*

<sup>a)</sup>Corresponding author: [fangranduoduo@hotmail.com](mailto:fangranduoduo@hotmail.com)

<sup>b)</sup> Corresponding author: [lihuilmy@hotmail.com](mailto:lihuilmy@hotmail.com)

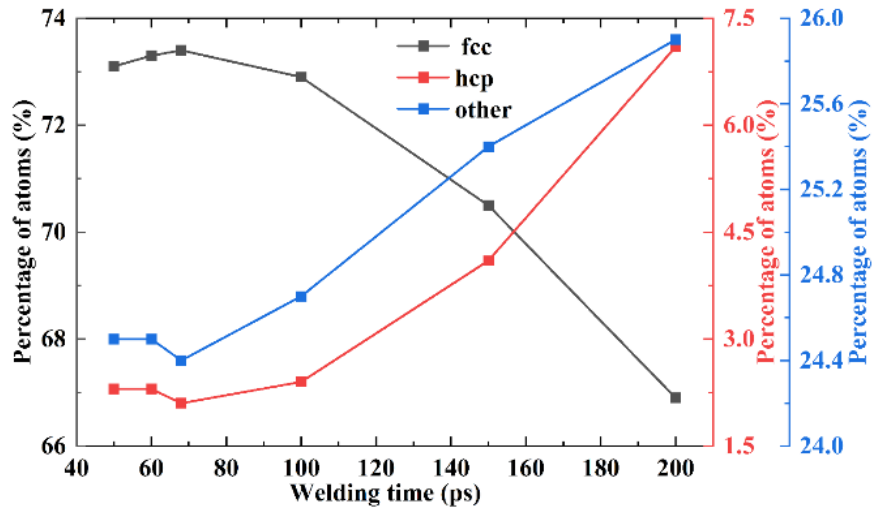

**Figure S1.** Effect of welding time on percentage of fcc and hcp atoms of joined nanowire after holding process

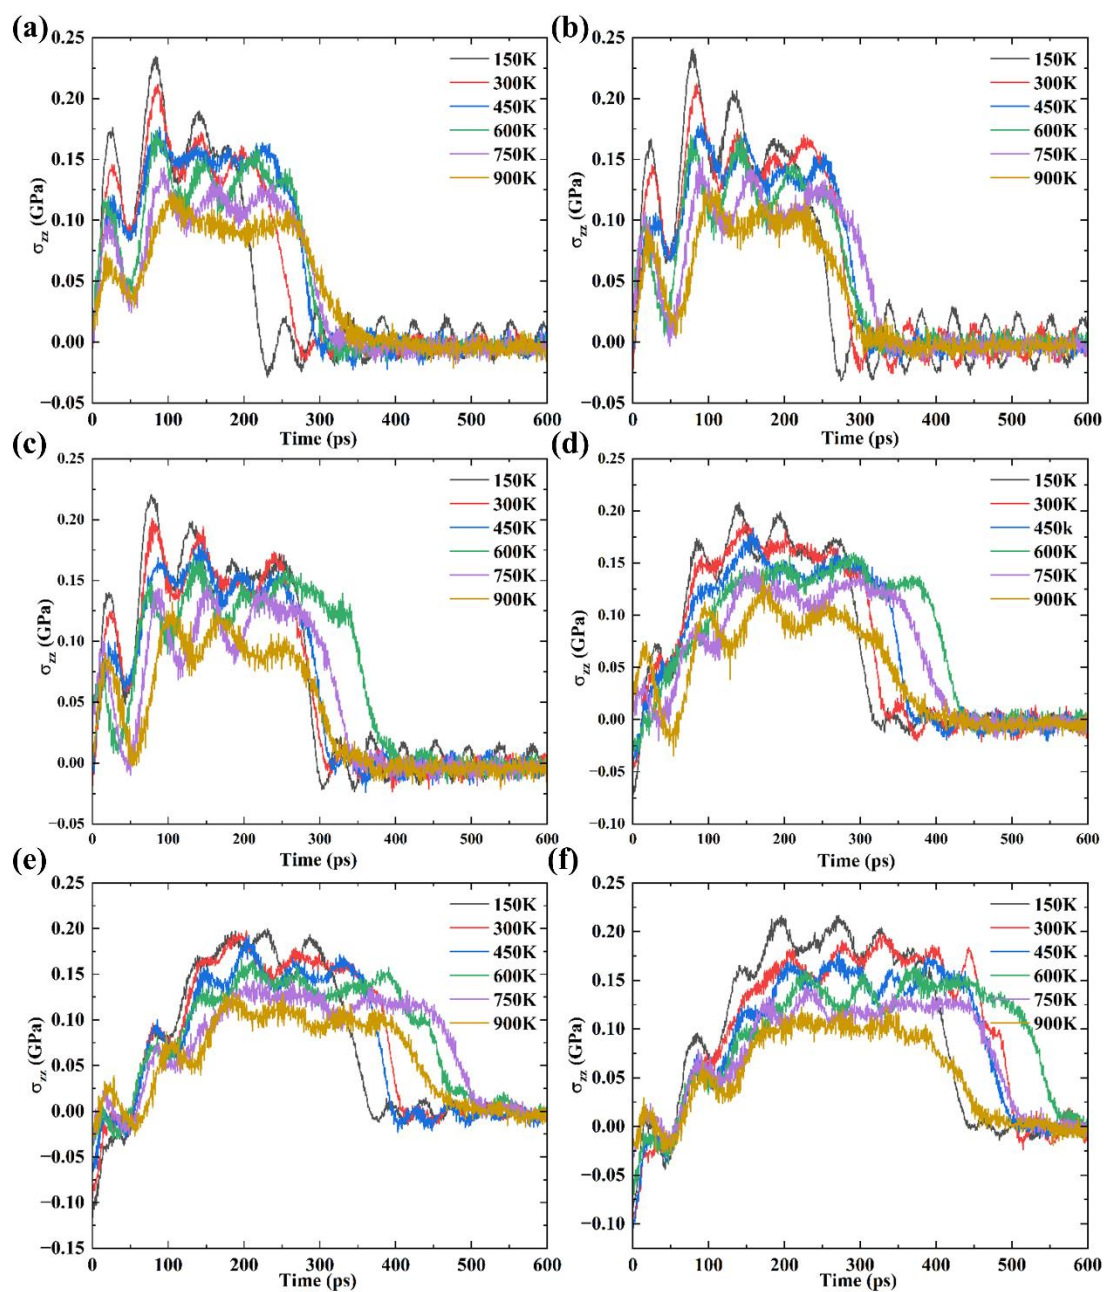

**Figure S2.** Variation of stress tensor of simulation system with time during stretching process along Z-direction. The welding time is (a) 50 ps, (b) 60 ps, (c) 68 ps, (d) 100 ps, (e) 150 ps and (f) 200 ps, respectively.

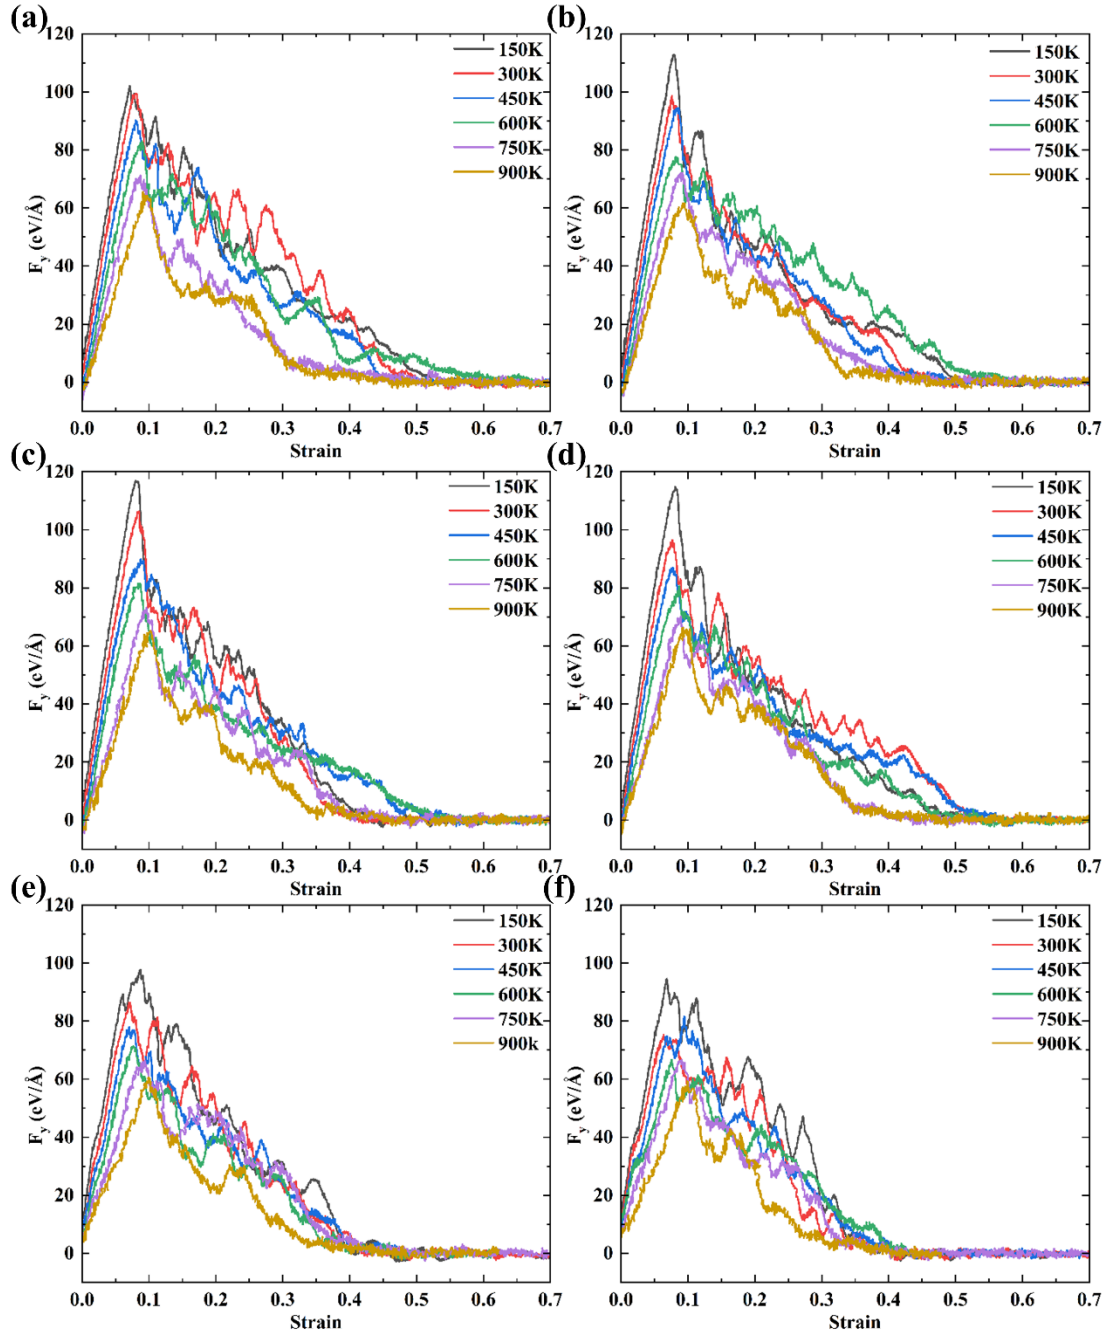

**Figure S3.** Variation of  $F_y - \varepsilon$  curves under uniaxial tensile strain along  $Y$ -direction. The welding time is (a) 50 ps, (b) 60 ps, (c) 68 ps, (d) 100 ps, (e) 150 ps and (f) 200 ps, respectively.

**Table S1** Simulation parameters of effect of welding time

| Group No. | Welding time (ps) | Holding time (ps) | Stretching time (ps) | Stretching direction | Welding velocity (m/s) | Stretching velocity (m/s) | Welding temperature (K) |
|-----------|-------------------|-------------------|----------------------|----------------------|------------------------|---------------------------|-------------------------|
| i         | 50                |                   |                      |                      |                        |                           |                         |
|           | 60                |                   |                      |                      |                        |                           |                         |
|           | 68                |                   |                      |                      |                        |                           |                         |
|           | 100               |                   | 600                  | Z-direction          |                        |                           |                         |
|           | 150               |                   |                      |                      |                        |                           |                         |
|           | 200               | 100               |                      |                      | 30                     | 30                        | 300                     |
| ii        | 50                |                   |                      |                      |                        |                           |                         |
|           | 60                |                   |                      |                      |                        |                           |                         |
|           | 68                |                   |                      |                      |                        |                           |                         |
|           | 100               |                   | 800                  | Y-direction          |                        |                           |                         |
|           | 150               |                   |                      |                      |                        |                           |                         |
| 200       |                   |                   |                      |                      |                        |                           |                         |

**Table S2** Simulation parameters of effect of welding temperature

| Group No. | Welding time (ps) | Holding time (ps) | Stretching time (ps) | Stretching direction | Welding velocity (m/s) | Stretching velocity (m/s) | Welding temperature (K) |
|-----------|-------------------|-------------------|----------------------|----------------------|------------------------|---------------------------|-------------------------|
| iii       |                   |                   | 600                  | Z-direction          |                        |                           | 150                     |
|           |                   |                   | 800                  | Y-direction          |                        |                           |                         |
| iv        |                   |                   | 600                  | Z-direction          |                        |                           | 450                     |
|           |                   |                   | 800                  | Y-direction          |                        |                           |                         |
| v         | 50-200            | 100               | 600                  | Z-direction          | 30                     | 30                        | 600                     |
|           |                   |                   | 800                  | Y-direction          |                        |                           |                         |
| vi        |                   |                   | 600                  | Z-direction          |                        |                           | 750                     |
|           |                   |                   | 800                  | Y-direction          |                        |                           |                         |
| vii       |                   |                   | 600                  | Z-direction          |                        |                           | 900                     |
|           |                   |                   | 800                  | Y-direction          |                        |                           |                         |
